# Supplementary material for: In vitrocharacterization of a novel C,N-cyclometalated benzimidazole Ru(ii) arene complex: stability, intracellular distribution and binding, effects on organic osmolyte homeostasis and induction of apoptosis
Source: Royal Society of Chemistry journal article supplement (doi:10.1039/c5mt00056d), 2015-01-01
Supplement: c5mt00056d1.pdf [file c5mt00056d1.pdf]

**Supplementary:**

**Theoretical and experimentally calculated isotopic patterns used for assignment of MS peaks in Fig. 5.**

Theoretical isotopic patterns were generated using the Scientific Instrument Services Isotope Distribution Calculator and Mass Spec Plotter (<http://www.sisweb.com/mstools/isotope.htm>). Experimentally calculated

isotopic patterns were obtained by the formula  $\frac{\text{Intensity of peak}}{\text{Intensity of main peak}} * 100\%$ . Similar theoretical and experimental isotopic distributions allowed for assignment of MS peaks in Fig. 5.

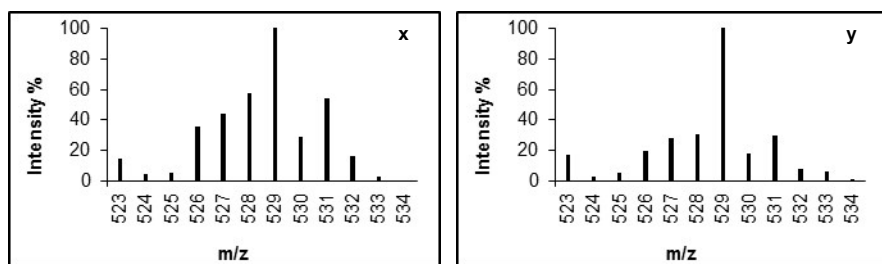

**Figure a:** x) Theoretical isotopic pattern and y) experimentally calculated isotopic pattern of m/z 529 peak ( $C_{28}H_{31}N_2O_2Ru$ )

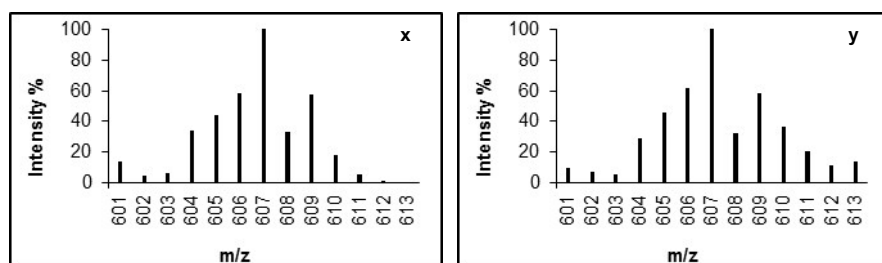

**Figure b:** x) Theoretical isotopic pattern and y) experimentally calculated isotopic pattern of m/z 607 peak ( $C_{30}H_{37}N_2O_3SRu$ )

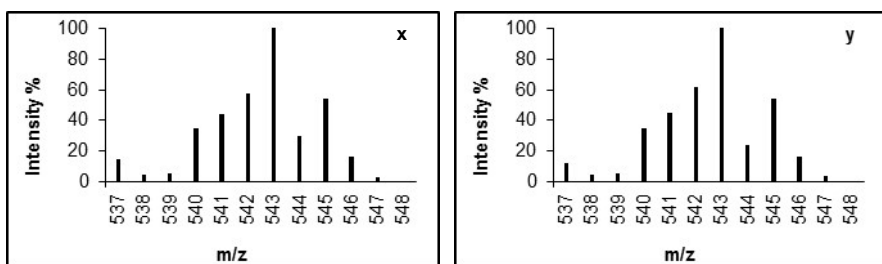

**Figure c:** x) Theoretical isotopic pattern and y) experimentally calculated isotopic pattern of m/z 543 peak ( $C_{29}H_{33}N_2O_2Ru$ )

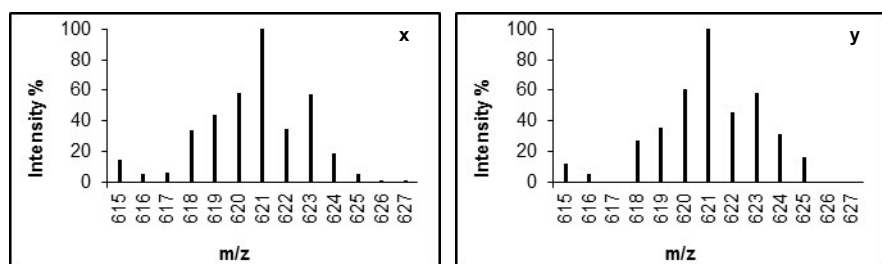

**Figure d:** x) Theoretical isotopic pattern and y) experimentally calculated isotopic pattern of m/z 621 peak ( $C_{31}H_{39}N_2O_3SRu$ )
